# Supplementary material for: Biocompatible Snowman-like Dimer Nanoparticles for Improved Cellular Uptake in Intrahepatic Cholangiocarcinoma
Source: MDPI journal article supplement (doi:10.3390/pharmaceutics15082132), 2023-08-14
Supplement: s1 [file s1]

## Support information

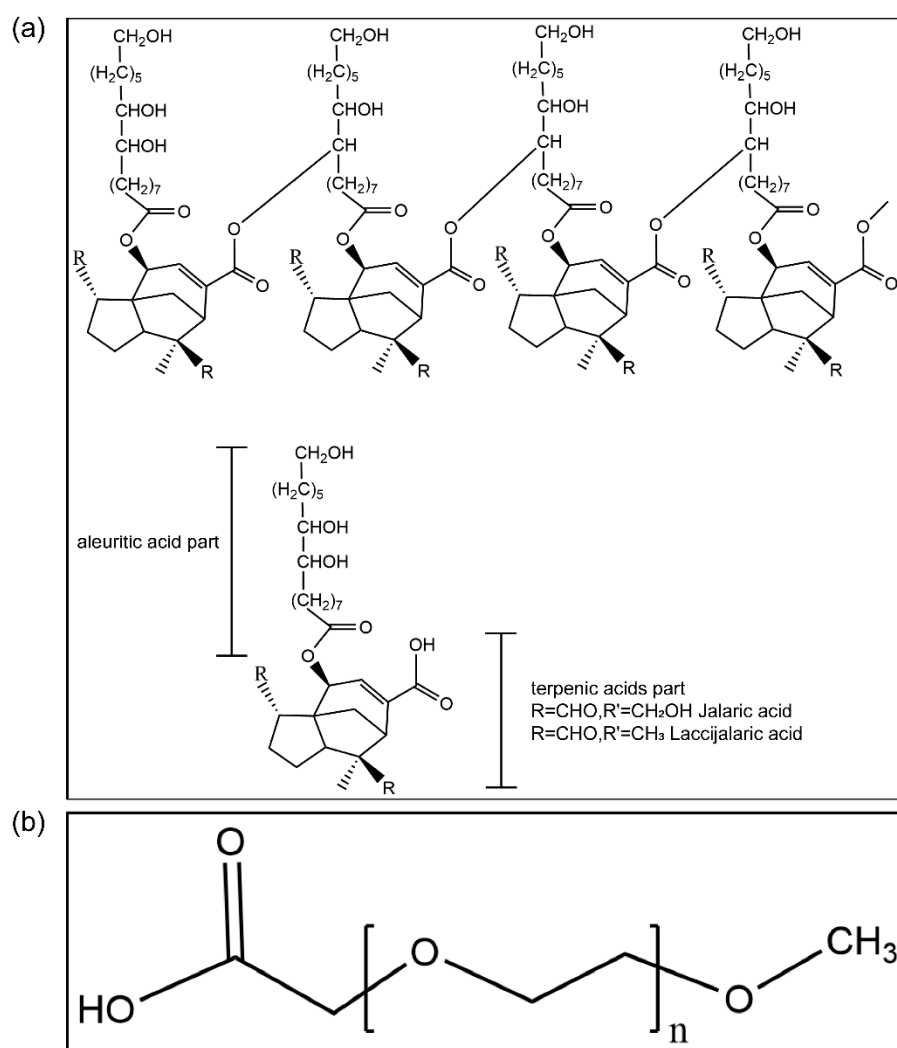

**Figure S1.** Chemical structures of (a) shellac and (b) PLA. Both PLA and shellac are FDA-approved materials.

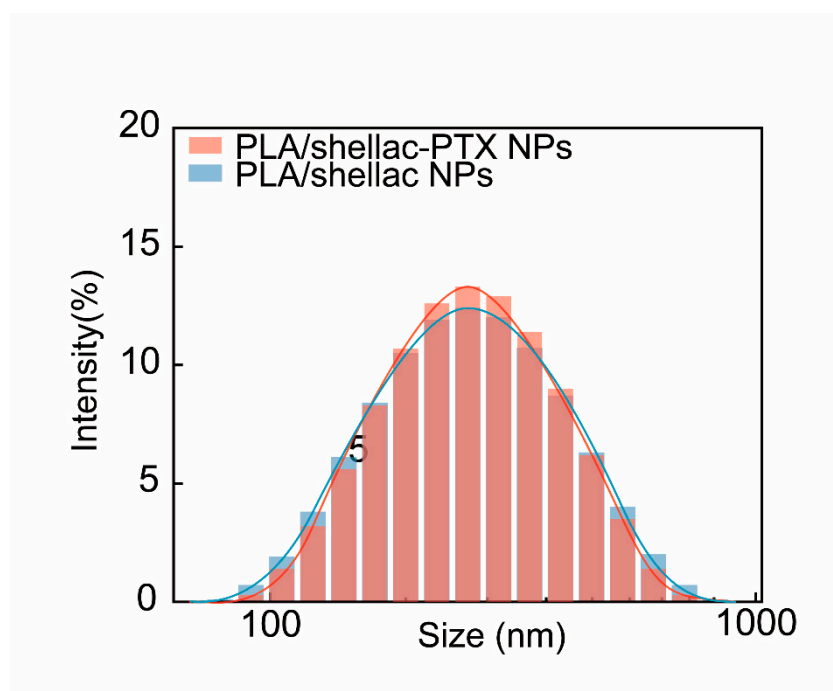

**Figure S2.** Particle size distribution of PLA/shellac NPs and PLA/shellac-PTX NPs measured by dynamic light scattering. No significant change in size measured by dynamic light scattering is observed after incubating PLA/shellac NPs in PBS with pH varied from 7.4 to 6.5 and 1 wt% Tween 80 for 5 days.

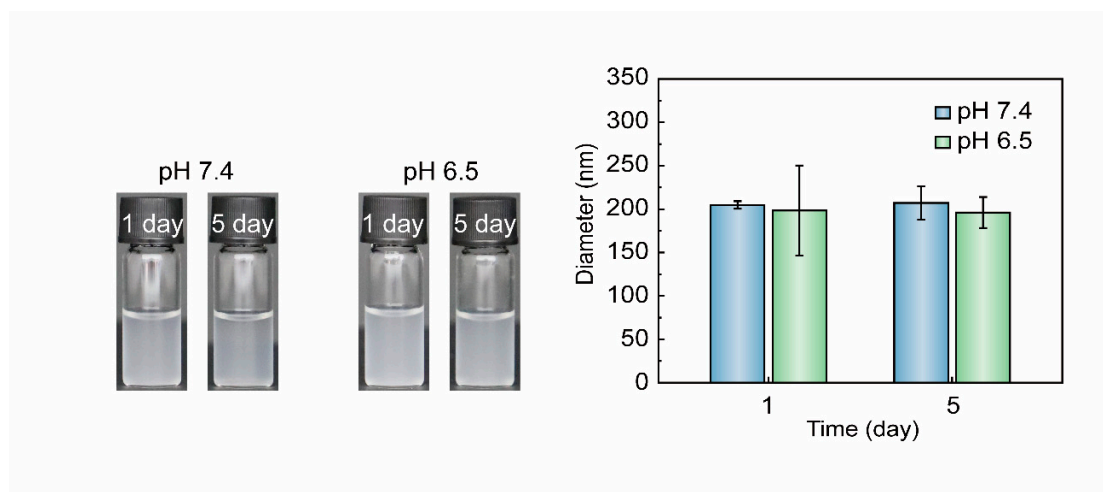

**Figure S3.** Stability of PLA/shellac dimer NPs in physiological and cancerous conditions. No significant change in size measured by dynamic light scattering is observed after incubating PLA/shellac NPs in PBS with pH varied from 7.4 to 6.5 for 5 days.

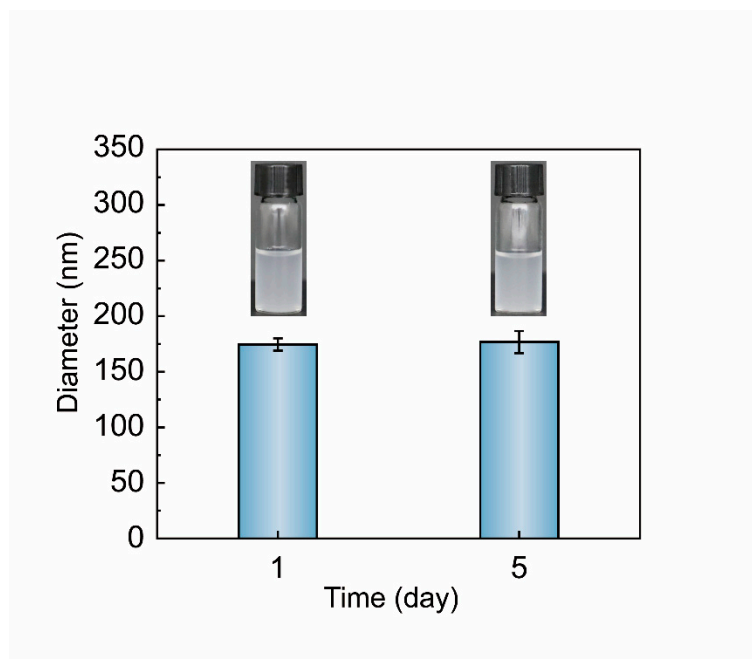

**Figure S4.** Stability of PLA/shellac dimer NPs in 1 wt% Tween 80. No significant change in size measured by dynamic light scattering is observed after incubating PLA/shellac NPs in 1 wt% Tween 80 for 5 days.
